# Supplementary material for: Prevalence of metabolic syndrome among adult population in India: A systematic review and meta-analysis
Source: PubMed Central journal article supplement (PMC7571716; doi:10.1371/journal.pone.0240971), 2020-10-19
Supplement: pone.0240971.s008.pdf [file pone.0240971.s008.pdf]

## **Supplementary File 1 Search strategy**

**PubMed Search:** ((((((((((Metabolic Syndrome) OR Syndrome) OR Insulin resistance syndrome) OR (((Hypertension) OR high blood pressure)) AND ((Hyperlipidemia) OR lipid disorder))) OR (((Hypertension) OR high blood pressure)) AND (((hyperglycemia) OR diabetes mellitus) OR high blood sugar))) OR ((abdominal obesity) AND ((Hypertension) OR high blood pressure))) OR (((Hyperlipidemia) OR lipid disorder)) AND (((hyperglycemia) OR diabetes mellitus) OR high blood sugar))) OR ((abdominal obesity) AND ((Hyperlipidemia) OR lipid disorder))) OR ((abdominal obesity) AND (((hyperglycemia) OR diabetes mellitus) OR high blood sugar))) AND prevalence) AND India

**Filters applied:** Observational Study, English, Humans

**Time point:** Inception till July 2019

**Citations obtained:** 172 results
